# Supplementary material for: Study of the Water Environment Risk Assessment of the Upper Reaches of the Baiyangdian Lake, China
Source: MDPI journal article supplement (doi:10.3390/w14162557), 2022-08-19
Supplement: s1 [file s1]

Archive with 1 entries (1 files):
- water-1781776-supplementary.pdf
