# Supplementary material for: Study of the Water Environment Risk Assessment of the Upper Reaches of the Baiyangdian Lake, China
Source: MDPI journal article supplement (doi:10.3390/w14162557), 2022-08-19
Supplement: s1 [file s1 › water-1781776-supplementary.pdf]

# Study of the Water Environment Risk Assessment of the Upper Reaches of the Baiyangdian Lake, China

Xiaoyan Guan, Xiaoqiang Ren, Yuan Tao, Xiaomin Chang and Bing Li

## Supplementary Material

### Questionnaire

Dear expert,

Thank you very much for taking a few minutes out of your busy schedule to complete the following survey. You can use the provided index system and fill in the following questionnaire based on your years of experience and subjective judgment. All the questions in the questionnaire are single-choice questions and are anonymous. All the answers will be kept confidential for analysis only. Please feel free to fill in. Now, let us start right away.

1 The factors influencing "Water environment risk" include "Risk sources", "River characteristics", "Physical geography and social development conditions", and "Water pollution control ability", etc. Of "Risk sources" compared with "River characteristics", which one do you think has a greater impact on "Water environment risk"? ( )

- A Risk sources
- B River characteristics
- C Both have the same degree of influence

2 The factors influencing "Water environment risk" include "Risk sources", "River characteristics", "Physical geography and social development conditions", and "Water pollution control ability", etc. Of "Risk sources" compared with "Physical geography and social development conditions", which one do you think has a greater impact on "Water environment risk"? ( )

- A Risk sources
- B Physical geography and social development conditions
- C Both have the same degree of influence

3 The factors influencing "Water environment risk" include "Risk sources", "River characteristics", "Physical geography and social development conditions", and "Water pollution control ability", etc. Of "Risk sources" compared with "Water pollution control ability", which one do you think has a greater impact on "Water environment risk"? ( )

- A Risk sources
- B Water pollution control ability
- C Both have the same degree of influence

4 The factors influencing "Water environment risk" include "Risk sources", "River characteristics", "Physical geography and social development conditions", and "Water pollution control ability", etc. Of "River characteristics" compared with "Physical geography and social development conditions", which one do you think has a greater impact on "Water environment risk"? ( )

- A River characteristics
- B Physical geography and social development conditions
- C Both have the same degree of influence

5 The factors influencing "Water environment risk" include "Risk sources", "River characteristics", "Physical geography and social development conditions", and "Water pollution control ability", etc. Of "River characteristics" compared with "Water pollution control ability", which one do you think has a greater impact on "Water environment risk"? ( )

- A River characteristics
- B Water pollution control ability
- C Both have the same degree of influence

6 The factors influencing "Water environment risk" include "Risk sources", "River characteristics", "Physical geography and social development conditions", and "Water pollution control ability", etc. Of "Physical geography and social development conditions" compared with "Water pollution control ability", which one do you think has a greater impact on "Water environment risk"? ( )

- A Physical geography and social development conditions
- B Water pollution control ability
- C Both have the same degree of influence

7 The factors influencing "Risk source" include "Non-point source pollution within the control range of the reaches", "Point source pollution within the control range of the reaches", and "Water environmental risk impacts of the adjacent upstream reaches", etc. Of "Non-point source pollution within the control range of the reaches" compared with "Point source pollution within the control range of the reaches", which one do you think has a greater impact on "Risk source"? ( )

- A Non-point source pollution within the control range of the reaches
- B Point source pollution within the control range of the reaches
- C Both have the same degree of influence

8 The factors influencing "Risk source" include "Non-point source pollution within the control range of the reaches", "Point source pollution within the control range of the reach", and "Water environmental risk impacts of the adjacent upstream reaches", etc. Of "Non-point source pollution within the control range of the reaches" compared with "Water environmental risk impacts of the adjacent upstream reaches", which one do you think has a greater impact on "Risk source"? ( )

- A Non-point source pollution within the control range of the reaches
- B Water environmental risk impacts of the adjacent upstream reaches
- C Both have the same degree of influence

9 The factors influencing "Risk source" include "Non-point source pollution within the control range of the reaches", "Point source pollution within the control range of the reaches", and "Water environmental risk impacts of the adjacent upstream reaches", etc. Of "Point source pollution within the control range of the reaches" compared with "Water environmental risk impacts of the adjacent upstream reaches", which one do you think has a greater impact on "Risk source"? ( )

- A Point source pollution within the control range of the reaches
- B Water environmental risk impacts of the adjacent upstream reaches
- C Both have the same degree of influence

10 The factors influencing "Water environmental risk impacts of the adjacent upstream reaches" include "Risk of adjacent upstream reaches" and "Distance to the adjacent upstream reaches", etc. Of "Risk of adjacent upstream reaches" compared with

"Distance to the adjacent upstream reaches", which one do you think has a greater impact on "Water environmental risk impacts of the adjacent upstream reaches"? ( )

- A Risk of adjacent upstream reaches
- B Distance to the adjacent upstream reaches
- C Both have the same degree of influence

11 The factors influencing "Non-point source pollution within the control range of the reaches" include "Planting pollution", "Livestock pollution", and "Rural living pollution", etc. Of "Planting pollution" compared with "Livestock pollution", which one do you think has a greater impact on "Non-point source pollution within the control range of the reaches"? ( )

- A Planting pollution
- B Livestock pollution
- C Both have the same degree of influence

12 The factors influencing "Non-point source pollution within the control range of the reaches" include "Planting pollution", "Livestock pollution", and "Rural living pollution", etc. Of "Planting pollution" compared with "Rural living pollution", which one do you think has a greater impact on "Non-point source pollution within the control range of the reaches"? ( )

- A Planting pollution
- B Rural living pollution
- C Both have the same degree of influence

13 The factors influencing "Non-point source pollution within the control range of the reaches" include "Planting pollution", "Livestock pollution", and "Rural living pollution", etc. Of "Livestock pollution" compared with "Rural living pollution", which one do you think has a greater impact on "Non-point source pollution within the control range of the reaches"? ( )

- A Livestock pollution
- B Rural living pollution
- C Both have the same degree of influence

14 The factors influencing "Rural living pollution" include "Domestic sewage discharge in rural areas" and "Human excrement and urine emissions in rural areas", etc. Of "Domestic sewage discharge in rural areas" compared with "Human excrement and urine emissions in rural areas", which one do you think has a greater impact on "Rural living pollution"? ( )

- A Domestic sewage discharge in rural areas
- B Human excrement and urine emissions in rural areas
- C Both have the same degree of influence

15 The factors influencing "Cross-section of river" include "Water quality" and "Discharge", etc. Of "Water quality" compared with "Discharge", which one do you think has a greater impact on "Cross-section of river"? ( )

- A Water quality
- B Discharge
- C Both have the same degree of influence

16 The factors influencing "Water quality condition" include "Water quality" and "Rate of water quality above the standard in water function zoning", etc. Of "Water quality" compared with "Rate of river water function zoning reaching the standard", which one do you think has a greater impact on "Water quality condition"? ( )

- A Water quality
- B Rate of river water function zoning reaching the standard
- C Both have the same degree of influence

17 The factors influencing "Physical geography and social development conditions" include "Social development" and "Physical geography", etc. Of "Social development" compared with "Physical geography", which one do you think has a greater impact on "Physical geography and social development conditions"? ( )

- A Social development

- B Physical geography
- C Both have the same degree of influence

18 The factors influencing "Social development" include "Population characteristics", and "Economic level", etc. Of "Population characteristics" compared with "Economic level", which one do you think has a greater impact on "Social development"? ( )

- A Population characteristics
- B Economic level
- C Both have the same degree of influence
